# Supplementary material
Source: PubMed Central journal article supplement (PMC2808237)
Supplement: E09-07-0579_1.pdf [file E09-07-0579_1.pdf]

# Plus-end entrainment can lead to self-organization of cortical microtubules in plants

Jun F. Allard\*, Geoffrey O. Wasteneys† and Eric N. Cytrynbaum\*

\**Institute of Applied Mathematics*, †*Department of Botany, University of British Columbia*  
Vancouver, British Columbia, Canada, V6T 1Z2

(Dated: July 9, 2009)

## SUPPLEMENTAL MATERIAL

### Three-state MTs considering only dynamic instability

In the absence of interactions, the length distribution of a population can be modeled using a partial differential equation [3]. For the two-state model,

$$\frac{\partial}{\partial t} \begin{bmatrix} N_g \\ N_s \end{bmatrix} = A \begin{bmatrix} N_g \\ N_s \end{bmatrix} + \frac{\partial}{\partial l} \left( V \begin{bmatrix} N_g \\ N_s \end{bmatrix} \right) \quad (1)$$

where  $N_g(l, t)$  and  $N_s(l, t)$  represent the density of growing and shrinking MTs of length  $l$ , respectively, and

$$A = \begin{bmatrix} -f_{gs} & f_{sg} \\ f_{gs} & -f_{sg} \end{bmatrix}, \quad V = \begin{bmatrix} -v_g & 0 \\ 0 & +v_s \end{bmatrix} \quad (2)$$

represent transitions between states and advection, respectively. If new MTs are nucleated with zero length and in the growing state at rate  $k$ , the boundary conditions are  $v_g N_g(0, t) = k$  and  $N_s(l, t) \rightarrow 0$  as  $l \rightarrow \infty$ . This leads to a unique steady-state  $N_i = \alpha_i \exp(-l/\bar{l})$  where

$$\bar{l} = \frac{v_g v_s}{f_{gs} v_s - f_{sg} v_g} \quad (3)$$

as long as the denominator is positive [3]. The mean lifetime can be found by assuming the system is in steady-state, when nucleation must balance a constant death rate  $\tau^{-1}$ ,

$$k = \frac{1}{\tau} \int_0^l N_g + N_s dl \quad (4)$$

where  $\tau$  is the mean lifetime. This gives

$$\tau = \frac{v_g + v_s}{f_{gs} v_s - f_{sg} v_g} \quad (5)$$

in agreement with [4]. For the three-state model, the partial differential equations now involve  $N_i(l, t)$ ,  $i = (g, p, s)$  and the matrices become

$$A = \begin{bmatrix} -(f_{gp} + f_{gs}) & f_{pg} & f_{sg} \\ f_{gp} & -(f_{pg} + f_{ps}) & f_{sp} \\ f_{gs} & f_{ps} & -(f_{sg} + f_{sp}) \end{bmatrix} \quad (6)$$

and

$$V = \begin{bmatrix} -v_g & 0 & 0 \\ 0 & 0 & 0 \\ 0 & 0 & +v_s \end{bmatrix}. \quad (7)$$

The mean length and mean lifetime can be found as above,

$$\bar{l} = \frac{v_g v_s (f_{pg} + f_{ps})}{D} \quad (8)$$

$$\tau = \frac{v_s (f_{gp} + f_{pg} + f_{ps}) + v_g (f_{sp} + f_{pg} + f_{ps})}{D} \quad (9)$$

where the denominator

$$D = v_s (f_{gp} f_{ps} + f_{gs} f_{pg} + f_{gs} f_{ps}) - v_g (f_{pg} f_{sg} + f_{pg} f_{sp} + f_{ps} f_{sg}) \quad (10)$$

is the threshold quantity: if it is negative, the mean length and lifetime are infinite. In both the two-state and three-state models, if the minus-end shrinks at a constant velocity, we make the coordinate transformation

$$v_g = v_g^p - v_s^m \quad (11)$$

$$v_s = v_s^p + v_s^m. \quad (12)$$

### Relationship between two-state models and Baulin et al. [1]

To understand the difference between catastrophe-inducing collisions and pause-inducing collisions, we consider the two-state model, which has five parameters,  $v_g^p$ ,  $v_s^p$ ,  $f_{gs}$  and  $f_{sg}$  which all pertain to the plus-end, and  $v_s^m$ , which pertains to the minus-end. In addition, the rate of nucleation,  $k_0$ , provides an additional time scale. However, if we rescale time to be measured in units of  $T \equiv (v_g^p)^{-2/3} k_0^{-1/3}$  and length  $L \equiv (v_g^p/k_0)^{1/3}$ , then the two-state model is described by four parameters,

$$\alpha = v_s^p/v_g^p \quad (13)$$

$$\beta = f_{gs} T \quad (14)$$

$$\gamma = 1/(f_{sg} T) \quad (15)$$

$$\delta = v_s^m/v_g^p. \quad (16)$$

(Note that scaling by  $\bar{l}$  and  $\tau$  is not appropriate here, since we are sometimes in the infinite-growth regime.) To ensure MT nucleation can occur,  $\delta < 1$ . In this parametrization, the model of Baulin et al. [1] corresponds to  $\alpha, \beta, \gamma \rightarrow 0$  and it completely described by one parameter,  $\delta$  (related to their  $\alpha$ , which they set in [0.17, 1.5]). The two-state parameters reported in [2] (Table 1) give  $\alpha = 1.8$ ,  $\beta = 0.16$ ,  $\gamma = 3.1$  and either  $\delta = 0$  (since they did not study minus-end dynamics) or  $\gamma = 0.09$  (using  $v_s^m$  from [5]).

### Effects of a catastrophe-inducing boundary in the absence of MT-MT interactions

Even in the absence of any MT-MT interactions, MTs randomly nucleated on a cylindrical cortex can lead to a transverse ordering if collisions with the boundaries induce catastrophe. A MT plus-end a distance  $y$  from the boundary making an angle  $\theta$ , measured from transverse the axis of the cylinder, can grow to a maximum length  $L = (L_C - y)/\sin\theta$  where  $L_C$  is the cell length. In this case, the right boundary condition on the system of partial differential equations in Eq. 1 is  $v_s N_s(L, t) = v_g N_g(L, t)$ . The solution is still exponential with decay length  $\bar{l}$  but is truncated. The average length of MTs of angle  $\theta$  at height  $y$  is

$$\langle l \rangle \propto \left(1 - e^{-y/(\bar{l} \sin \theta)}\right) \left(1 - e^{-(L_C - y)/(\bar{l} \sin \theta)}\right). \quad (17)$$

From this it is straightforward to compute the order parameter  $S$ . We can also compute a *local* order parameter  $S(y)$  that takes into account all MTs passing through a given  $y$  value (a given circumference of the cylinder). Although  $S(y)$  has no closed form, it can be computed numerically. We find that this boundary-induced order-

ing decays away from the boundaries towards midcell, with a decay length scale of roughly  $\bar{l}$  (data not shown).

- 
- [1] Vladimir A. Baulin, Carlos M. Marques, and Fabrice Thalmann. Collision induced spatial organization of microtubules. *Biophysical Chemistry*, 128(2):231–244, 2007.
  - [2] Ram Dixit and Richard Cyr. Encounters between Dynamic Cortical Microtubules Promote Ordering of the Cortical Array through Angle-Dependent Modifications of Microtubule Behavior. *Plant Cell*, 16(12):3274–3284, 2004. doi: 10.1105/tpc.104.026930.
  - [3] Marileen Dogterom and Stanislas Leibler. Physical aspects of the growth and regulation of microtubule structures. *Phys. Rev. Lett.*, 70(9):1347–1350, Mar 1993. doi: 10.1103/PhysRevLett.70.1347.
  - [4] Robert J. Rubin. Mean Lifetime of Microtubules Attached to Nucleating Sites. *Proceedings of the National Academy of Sciences*, 85(2):446–448, 1988. doi: 10.1073/pnas.85.2.446.
  - [5] Sidney L. Shaw, Roheena Kamyar, and David W. Ehrhardt. Sustained Microtubule Treadmilling in Arabidopsis Cortical Arrays. *Science*, 300(5626):1715–1718, 2003. doi: 10.1126/science.1083529.
